# Supplementary material for: Synthetic Flavonoid BrCl-Flav—An Alternative Solution to Combat ESKAPE Pathogens
Source: MDPI journal article supplement (doi:10.3390/antibiotics11101389), 2022-10-11
Supplement: s1 [file s1]

## Supplementary Materials

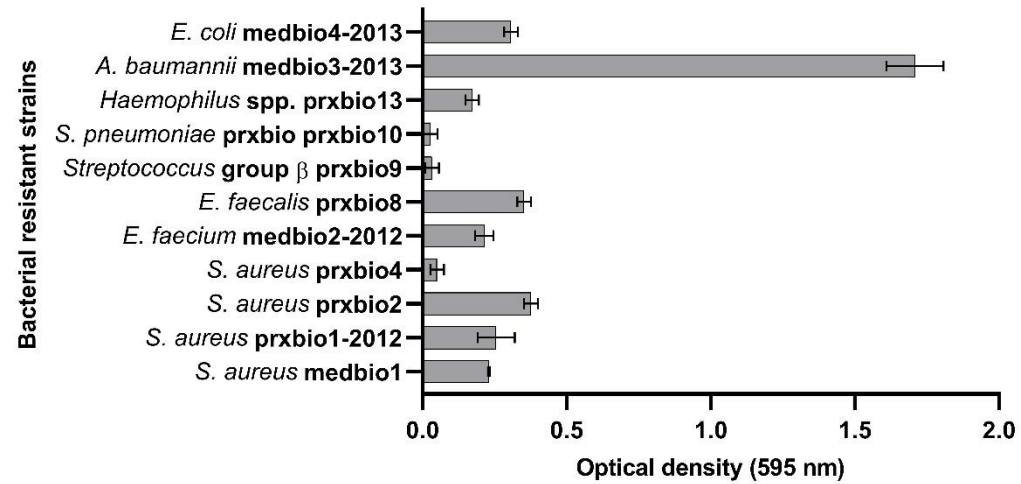

Figure S1. Biofilm-forming capacity of different clinical isolates. Bars indicate SEM.

Table S1. Antibiotic resistance profile of the tested clinical isolates

| Bacterial strains                         | Antibiotics                 |            |                      |           |            |             |           |               |             |                 |              |            |            |          |              |              |                |           |            |              |                         |              |                              |
|-------------------------------------------|-----------------------------|------------|----------------------|-----------|------------|-------------|-----------|---------------|-------------|-----------------|--------------|------------|------------|----------|--------------|--------------|----------------|-----------|------------|--------------|-------------------------|--------------|------------------------------|
|                                           | Amoxicillin/Clavulanic acid | Ampicillin | Ampicillin/Sulbactam | Cefazolin | Cefotaxime | Ceftazidime | Cefoxitin | Ciprofloxacin | Clindamycin | Chloramphenicol | Erythromycin | Fosfomycin | Gentamicin | Imipenem | Levofloxacin | Moxifloxacin | Nitrofurantoin | Oxacillin | Penicillin | Piperacillin | Piperacillin/Tazobactam | Tetracycline | Trimethoprim/Sulfamethoxazol |
| <i>Staphylococcus aureus</i> medbio1-2012 | -                           | -          | -                    | -         | -          | -           | R         | -             | R           | S               | R            | -          | -          | -        | -            | R            | -              | -         | R          | -            | -                       | R            | -                            |
| <i>S. aureus</i> prxbio1                  | -                           | -          | -                    | -         | -          | -           | S         | -             | S           | S               | S            | -          | -          | -        | -            | S            | -              | -         | R          | -            | -                       | S            | -                            |
| <i>S. aureus</i> prxbio2                  | -                           | -          | -                    | -         | -          | -           | R         | -             | R           | S               | R            | -          | -          | -        | -            | -            | -              | -         | -          | -            | -                       | R            | -                            |
| <i>S. aureus</i> prxbio3                  | -                           | -          | -                    | -         | -          | -           | S         | S             | S           | -               | R            | -          | S          | -        | S            | -            | -              | -         | -          | -            | -                       | -            | S                            |
| <i>S. aureus</i> prxbio4                  | -                           | -          | -                    | -         | -          | -           | R         | -             | S           | S               | R            | -          | -          | -        | -            | S            | -              | -         | -          | -            | -                       | S            | -                            |
| <i>S. aureus</i> prxbio5                  | -                           | -          | -                    | -         | -          | -           | R         | R             | S           | S               | R            | -          | S          | -        | -            | -            | -              | -         | -          | -            | -                       | R            | -                            |
| <i>S. aureus</i> prxbio6                  | -                           | -          | -                    | -         | -          | -           | R         | S             | S           | S               | R            | -          | R          | -        | -            | -            | -              | -         | -          | -            | -                       | R            | -                            |
| <i>S. aureus</i> prxbio7                  | -                           | -          | -                    | -         | -          | -           | S         | -             | S           | S               | R            | -          | -          | -        | -            | S            | -              | -         | -          | -            | -                       | R            | -                            |
| <i>Streptococcus</i> spp. prxbio9         | -                           | S          | -                    | -         | -          | -           | -         | -             | R           | S               | R            | -          | -          | -        | S            | -            | -              | -         | S          | -            | -                       | R            | -                            |
| <i>S. pneumoniae</i> prxbio10             | -                           | -          | -                    | -         |            | -           | -         | -             | R           | R               | R            | -          | -          | -        | -            | S            | -              | R         | -          | -            | -                       | R            | -                            |

|                                                |   |   |   |   |   |   |   |   |   |   |   |   |   |   |   |   |   |   |   |   |   |   |   |
|------------------------------------------------|---|---|---|---|---|---|---|---|---|---|---|---|---|---|---|---|---|---|---|---|---|---|---|
| <i>Enterococcus faecium</i><br>medbio2-2012    | - | R | - | - | - | - | - | R | - | - | - | S | R | - | R | - | R | - | R | - | - | - | - |
| <i>E. faecalis</i> prxbio8                     | - | S | - | - | - | - | - | S | - | S | - | - | R | - | S | - | - | - | - | - | - | R | - |
| <i>Acinetobacter baumannii</i><br>medbio3-2013 | - | - | S | - | I | R | - | S | - | - | - | - | S | S | - | - | - | - | - | S | - | - | S |
| <i>Escherichia coli</i> medbio4-<br>2013       | S | R | - | R | R | - | - | R | - | - | - | - | S | - | - | - | S | - | - | - | - | - | R |
| <i>Enterobacter cloacae</i><br>medbio5-2013    | R | R | - | R | R | - | - | S | - | - | - | - | S | - | - | - | R | - | - | - | - | - | S |
| <i>Klebsiella pneumoniae</i><br>medbio6-2013   | R | R | - | R | R | - | - | R | - | - | - | - | R | - | - | - | R | - | - | - | - | - | S |
| <i>K. pneumoniae</i> prxbio11                  | R | - | S |   | S | S | - | S | - | - | - | - | - | - | S | - | - | - | - | S | - | - | S |
| <i>K. pneumoniae</i> prxbio12                  | S | R | - | R | R | - | - | R | - | - | - | - | S | - | - | - | R | - | - | - | - | - | S |
| <i>Pseudomonas aeruginosa</i><br>medbio7-2013  | - | - | - | - | - | R | - | S | - | - | - | - | S | S | S | - | - | - | - | S | S | - | - |
| <i>Salmonella enterica</i><br>medbio8-2013     | - | S | - | - | - | - | - | S | - | - | - | - | - | - | - | - | - | - | - | - | - | - | S |
| <i>Haemophilus</i> spp<br>prxbio13             | S | - | - | - | S | - | - | S | - | S | - | - | - | - | - | - | S | - | - | - | - | R | - |

R = resistant; I = intermediate; S= sensitive
